# Supplementary material
Source: MDPI journal article supplement (https://www.mdpi.com/2077-0472/14/5/658)
Supplement: s1 [file s1]

## **Supplementary Information**

### **Heterogeneity of Intramuscular, Intermuscular, and Subcutaneous Fat in Laiwu Pigs: Insights from Targeted Lipidomics and Transcriptomics**

Jian Xu<sup>1, #</sup>, Tianwen Wu<sup>1, #</sup>, Sin Man Lam<sup>2</sup>, Guanghou Shui<sup>2</sup>, Shulin Yang<sup>1</sup>, Yanfang Wang<sup>1, \*</sup>, Cong Tao<sup>1, \*</sup>

<sup>1</sup> State Key Laboratory of Animal Biotech Breeding, Institute of Animal Science, Chinese Academy of Agricultural Sciences (CAAS), Beijing 100193, China

<sup>2</sup> Institute of Genetics and Developmental Biology, Chinese Academy of Sciences, Beijing 100101, China

\* Correspondence: taocong@caas.cn (C.T.); wangyanfang@caas.cn (Y.W.)

# The authors contributed equally to this work.

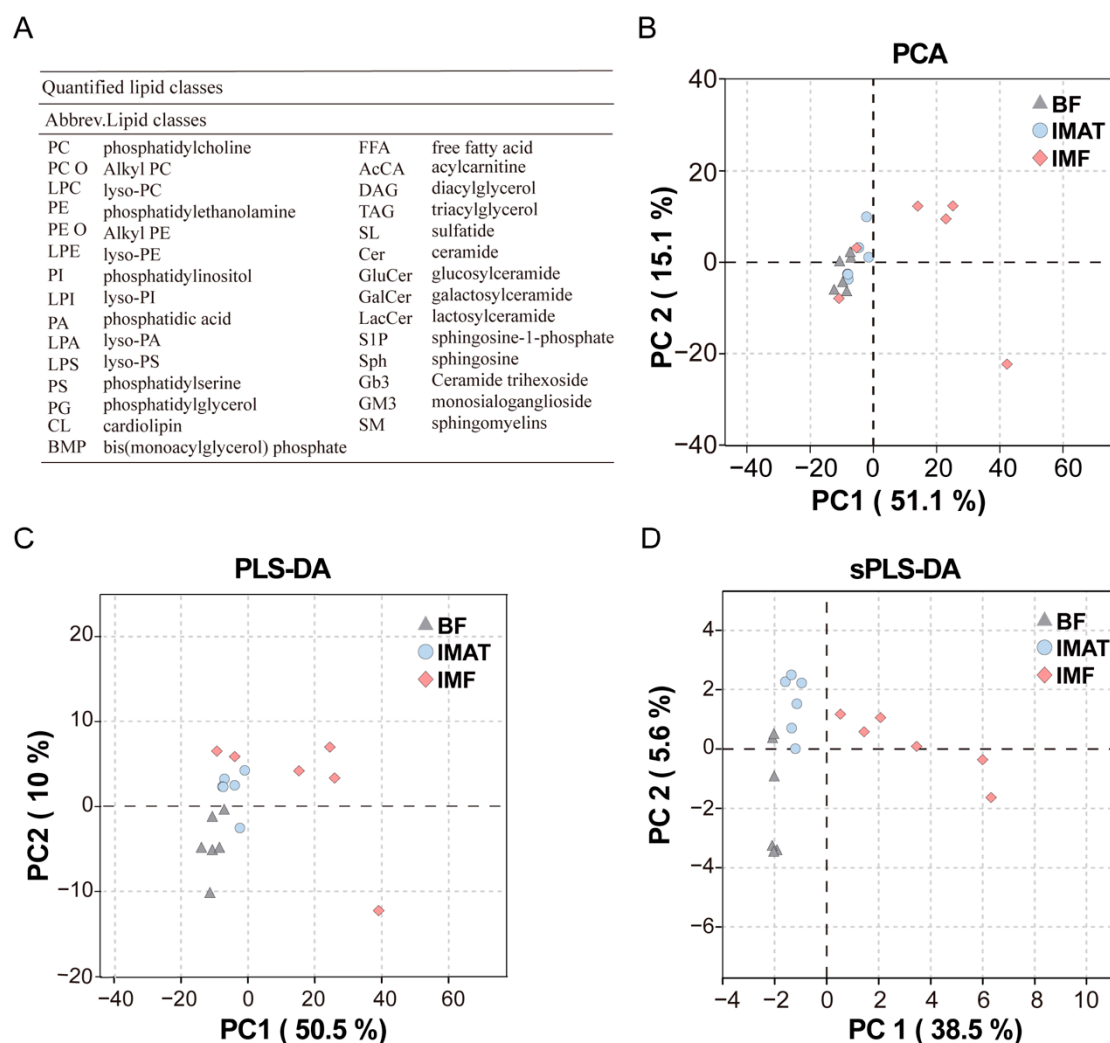

Figure S1. Multivariate data analysis of LC-MS lipidomics data from adipose tissue samples of 12-month-old Laiwu pigs. (A) Quantified lipid classes and their abbreviations used throughout the study. (B) Unsupervised PCA score plot. (C,D) Supervised PLS-DA and sPLS-DA models. Grey, light blue, and light red symbols represent inner BF, IMAT, and IMF samples from Laiwu pigs, respectively ( $n = 6$ ).



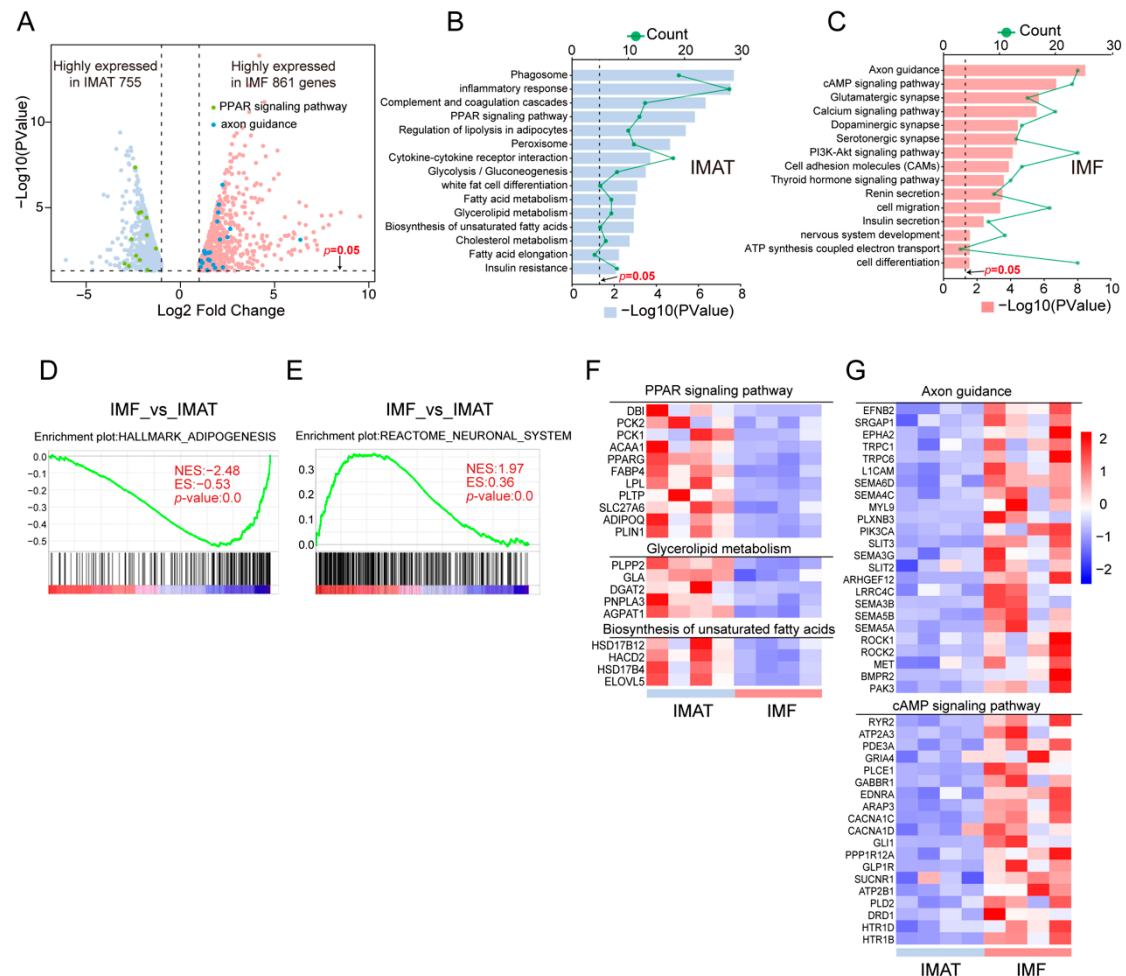

Figure S3. IMF exhibits a reduced capacity for lipid deposition and increased innervation compared to IMAT. (A) Representation of the differentially expressed genes between backfat and intramuscular adipose tissue. Genes overexpressed in IMAT and IMF are indicated in grey and pink, respectively. Genes enriched in the PPAR signaling pathway and axon guidance are highlighted. (B-C) GO analysis for highly expressed genes in IMF, and KEGG analysis for those in IMAT. (D-E) GSEA enrichment analyses between IMAT and IMF. (F) The heatmap of the genes involved in the PPAR signaling pathway, glycerolipid metabolism, and biosynthesis of unsaturated fatty acids. (G) The heatmap of the genes associated with axon guidance, and cAMP signaling pathway.

Table S1 The primers for RT-PCR

| Gene          | Name    | Primer                 |
|---------------|---------|------------------------|
| <i>18S</i>    | Forward | GTAACCCGTTGAACCCCATTT  |
|               | Reverse | CCATCCAATCGGTAGTAGCG   |
| <i>CIDEA</i>  | Forward | GTCAAGGCCACCATGTACGA   |
|               | Reverse | AGCATTCGGAGCATGTACGT   |
| <i>GK</i>     | Forward | CGCTGAGGAAAGTGAAATCCG  |
|               | Reverse | TCGCGTCTTTGGAATCTACGA  |
| <i>UGT8</i>   | Forward | TGAACATGGCTTTGTCCTGG   |
|               | Reverse | TGCGGTAACCATTCTATGAGC  |
| <i>ADIPOQ</i> | Forward | AGATTGGCTGGTTGATGCTCA  |
|               | Reverse | AAACCAGATGTCACACTTGCC  |
| <i>FABP4</i>  | Forward | GGCCAAACCCAACCTGATCA   |
|               | Reverse | CATCCCACCTTCTGCACCTGT  |
| <i>PPARG</i>  | Forward | GTCATGGGTGAAACTCTGGGA  |
|               | Reverse | TGTCAACCATGGTCACCTCTTG |
| <i>AGPAT1</i> | Forward | CCCTATGTCGTCGTCTCCAA   |
|               | Reverse | AACCTCGGACATGACACTGA   |
| <i>PNPLA3</i> | Forward | CTCCACCCATCCTTCAACCT   |
|               | Reverse | ACATATCGCTCGCCTCTGAA   |
| <i>ELOVL6</i> | Forward | CCGGAAGTTTGCCATGTTCA   |
|               | Reverse | GCAGAAGAGCACAAGGTAGC   |
| <i>DGAT2</i>  | Forward | CCCTCATAGCTGCCTACTCC   |
|               | Reverse | GAGGAAAGACAGGACCCACT   |
| <i>FASN</i>   | Forward | CTGATCAAGGTGCTGCTGTC   |
|               | Reverse | CGAAGGAGTTTATGCCACG    |
| <i>SCD</i>    | Forward | CTTCCTGATCATTGCCAACA   |
|               | Reverse | GCAAACCACCCTTCTCTTTG   |
| <i>ACACA</i>  | Forward | CGTGCAATCCGGTTTGTGT    |
|               | Reverse | TGTTGTTGTTTGGGCCTCCT   |
